# Supplementary material for: Cancer-Associated Fibroblasts Promote the Chemo-resistance in Gastric Cancer through Secreting IL-11 Targeting JAK/STAT3/Bcl2 Pathway
Source: PubMed Central journal article supplement — Cancer Res Treat. 2018 Apr 20;51(1):194–210. doi: 10.4143/crt.2018.031 (PMC6333970; doi:10.4143/crt.2018.031), 2018-04-20
Supplement: crt-2018-031-suppl.pdf [file crt-2018-031-suppl.pdf]

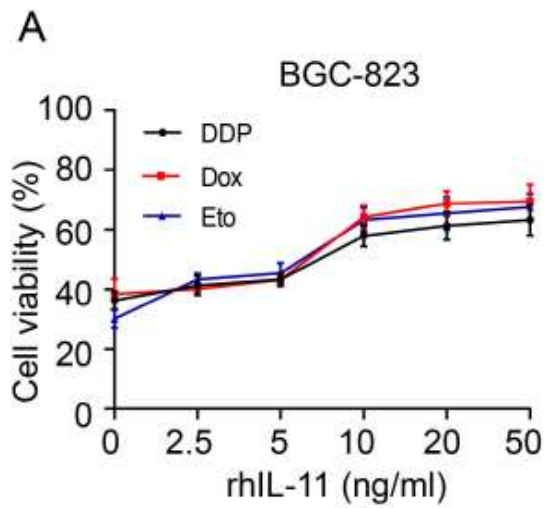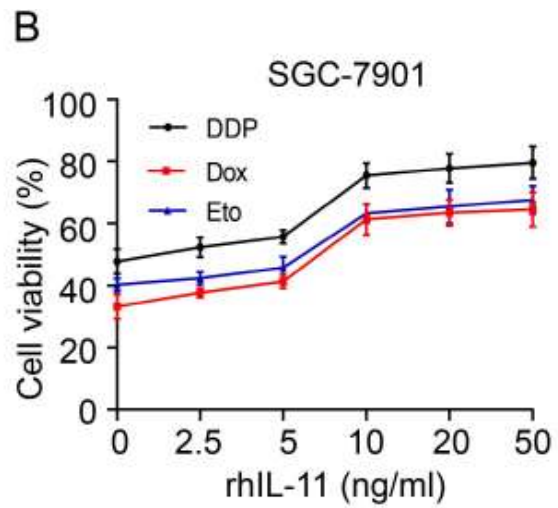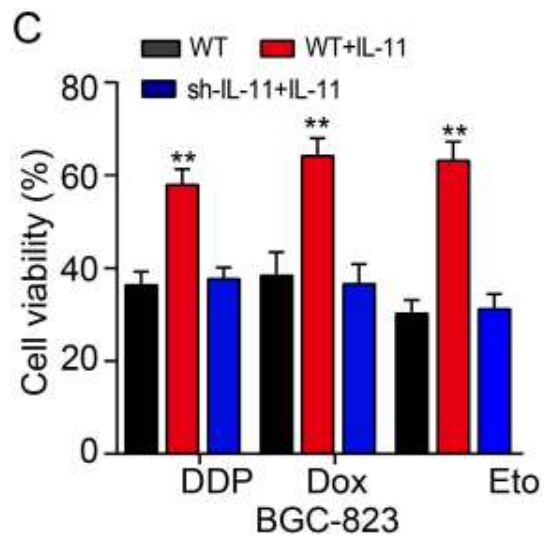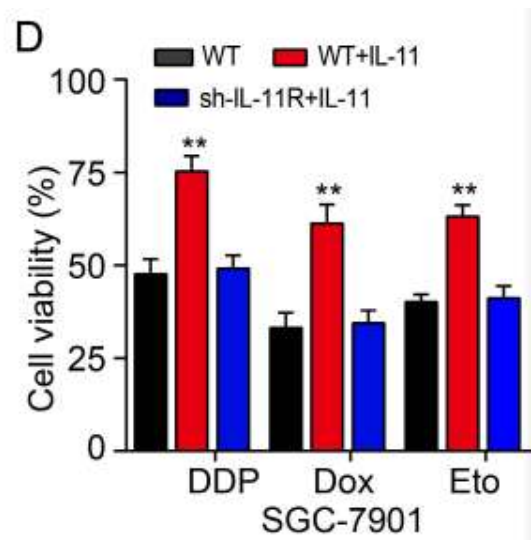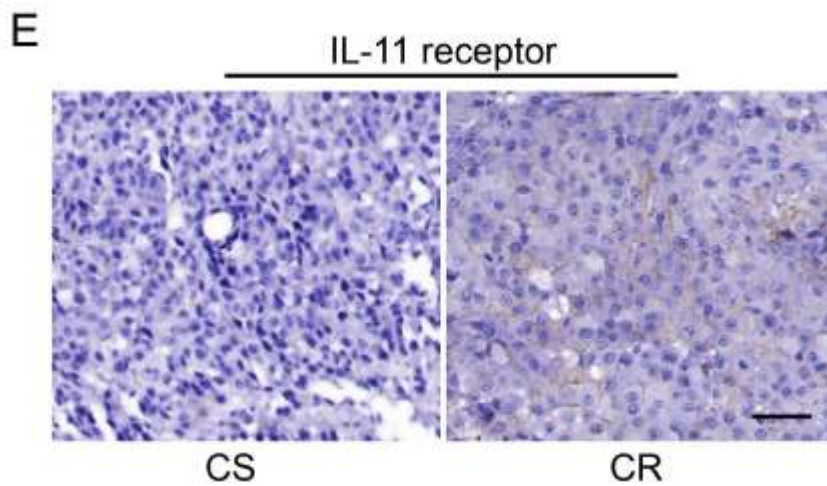

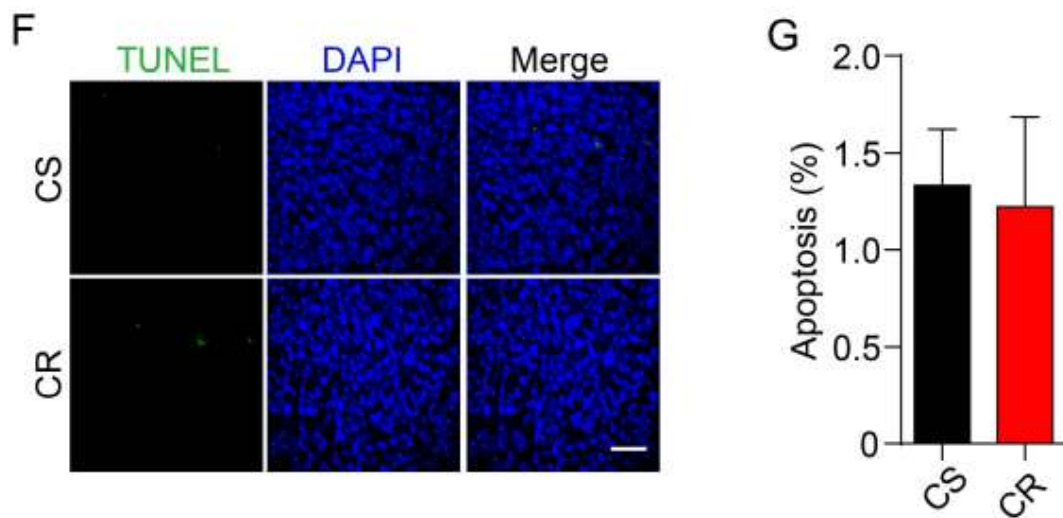

**S1 Fig.** (A) The cell viability of BGC823 cells that pre-treated with gradient rhIL-11 followed by chemotherapeutic agents treatment. (B) The cell viability of SGC7901 cells that pre-treated with gradient rhIL-11 followed by chemotherapeutic agents treatment. (C) The cell viability of wild type (WT) or interleukin 11 (IL-11) knocking down BGC823 cells that pre-treated with rhIL-11 followed by chemotherapeutic agents treatment. (D) The cell viability of WT or IL-11 knocking down SGC7901 cells that pre-treated with rhIL-11 followed by chemotherapeutic agents treatment. (E) The expression of IL-11 receptor in tumor tissues from chemo-sensitive (CS) or chemo-resistant (CR) patients by immunohistochemistry. Scale bar=50  $\mu$ m. (F) The apoptosis of cells in tumor tissues from CS or CR patients was detected by ATUNEL detection kit. Scale bar=50  $\mu$ m. (G) The percentage of apoptosis cells in tumor tissues from CS or CR patients. \*\* $p < 0.01$ .
